# Supplementary material for: Phosphodiesterase 5 (PDE5) Is Highly Expressed in Cancer-Associated Fibroblasts and Enhances Breast Tumor Progression
Source: PubMed Central journal article supplement (PMC6895904; doi:10.3390/cancers11111740), 2019-11-06
Supplement: cancers-11-01740-s001.pdf [file cancers-11-01740-s001.pdf]

Article

# Phosphodiesterase 5 (PDE5) is Highly Expressed in Cancer-Associated Fibroblasts and Enhances Breast Tumor Progression

Stefania Catalano <sup>1</sup>, Salvatore Panza <sup>1</sup>, Giuseppina Augimeri <sup>1</sup>, Cinzia Giordano <sup>1,2</sup>, Rocco Malivindi <sup>1</sup>, Luca Gelsomino <sup>1</sup>, Stefania Marsico <sup>1</sup>, Francesca Giordano <sup>1</sup>, Balázs Gyórfy <sup>3</sup>, Daniela Bonofiglio <sup>1</sup>, Sebastiano Andò <sup>1,2,+</sup> and Ines Barone <sup>1,+,\*</sup>

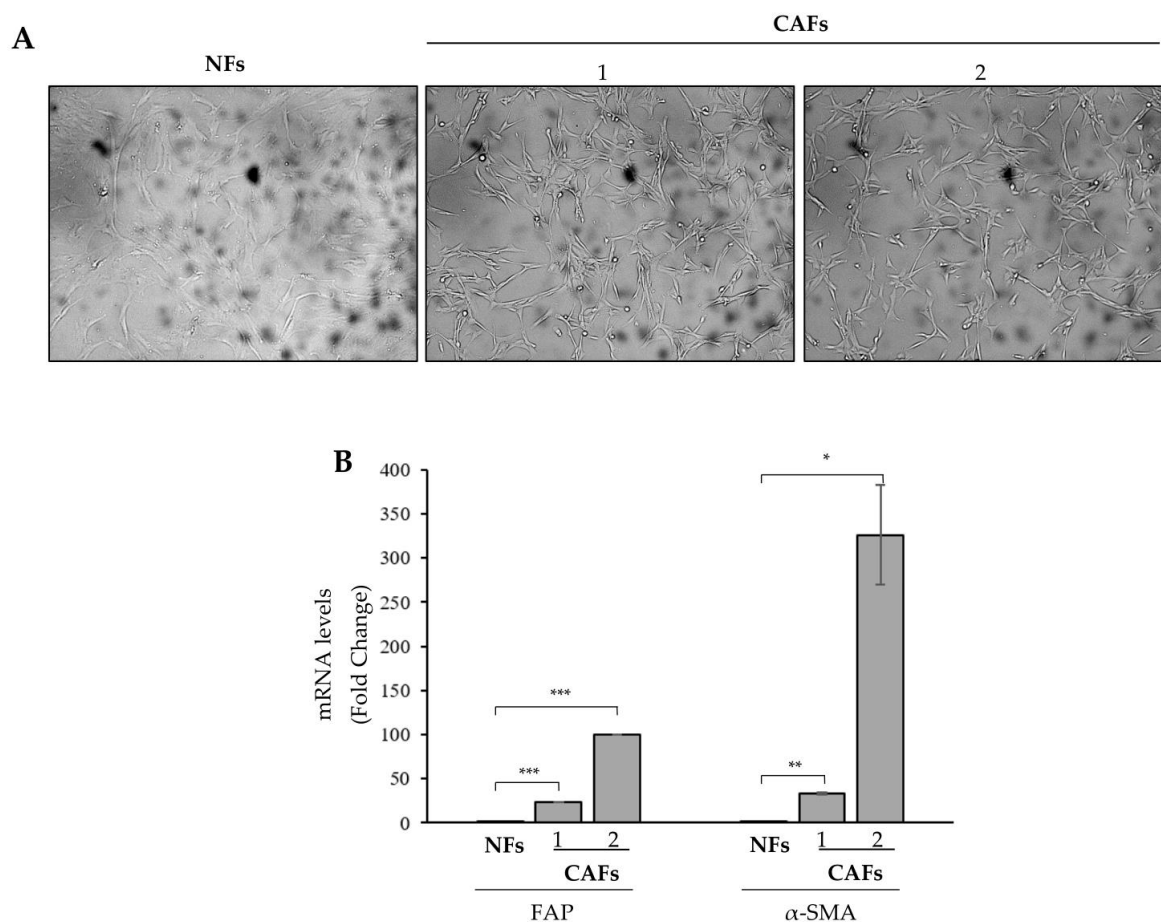

**Supplementary Figure S1: Characterization of human CAFs.** (A) Morphology of Normal Fibroblasts (NFs) and Cancer-associated Fibroblasts (CAF1 and 2) in monolayer growth using phase contrast microscopy. (B) Realtime RT-PCR assay for FAP and  $\alpha$ -SMA mRNA expression in NFs, CAF1 and CAF2. \*  $p < 0.05$ , \*\*  $p < 0.005$ , \*\*\*  $p < 0.0005$ .

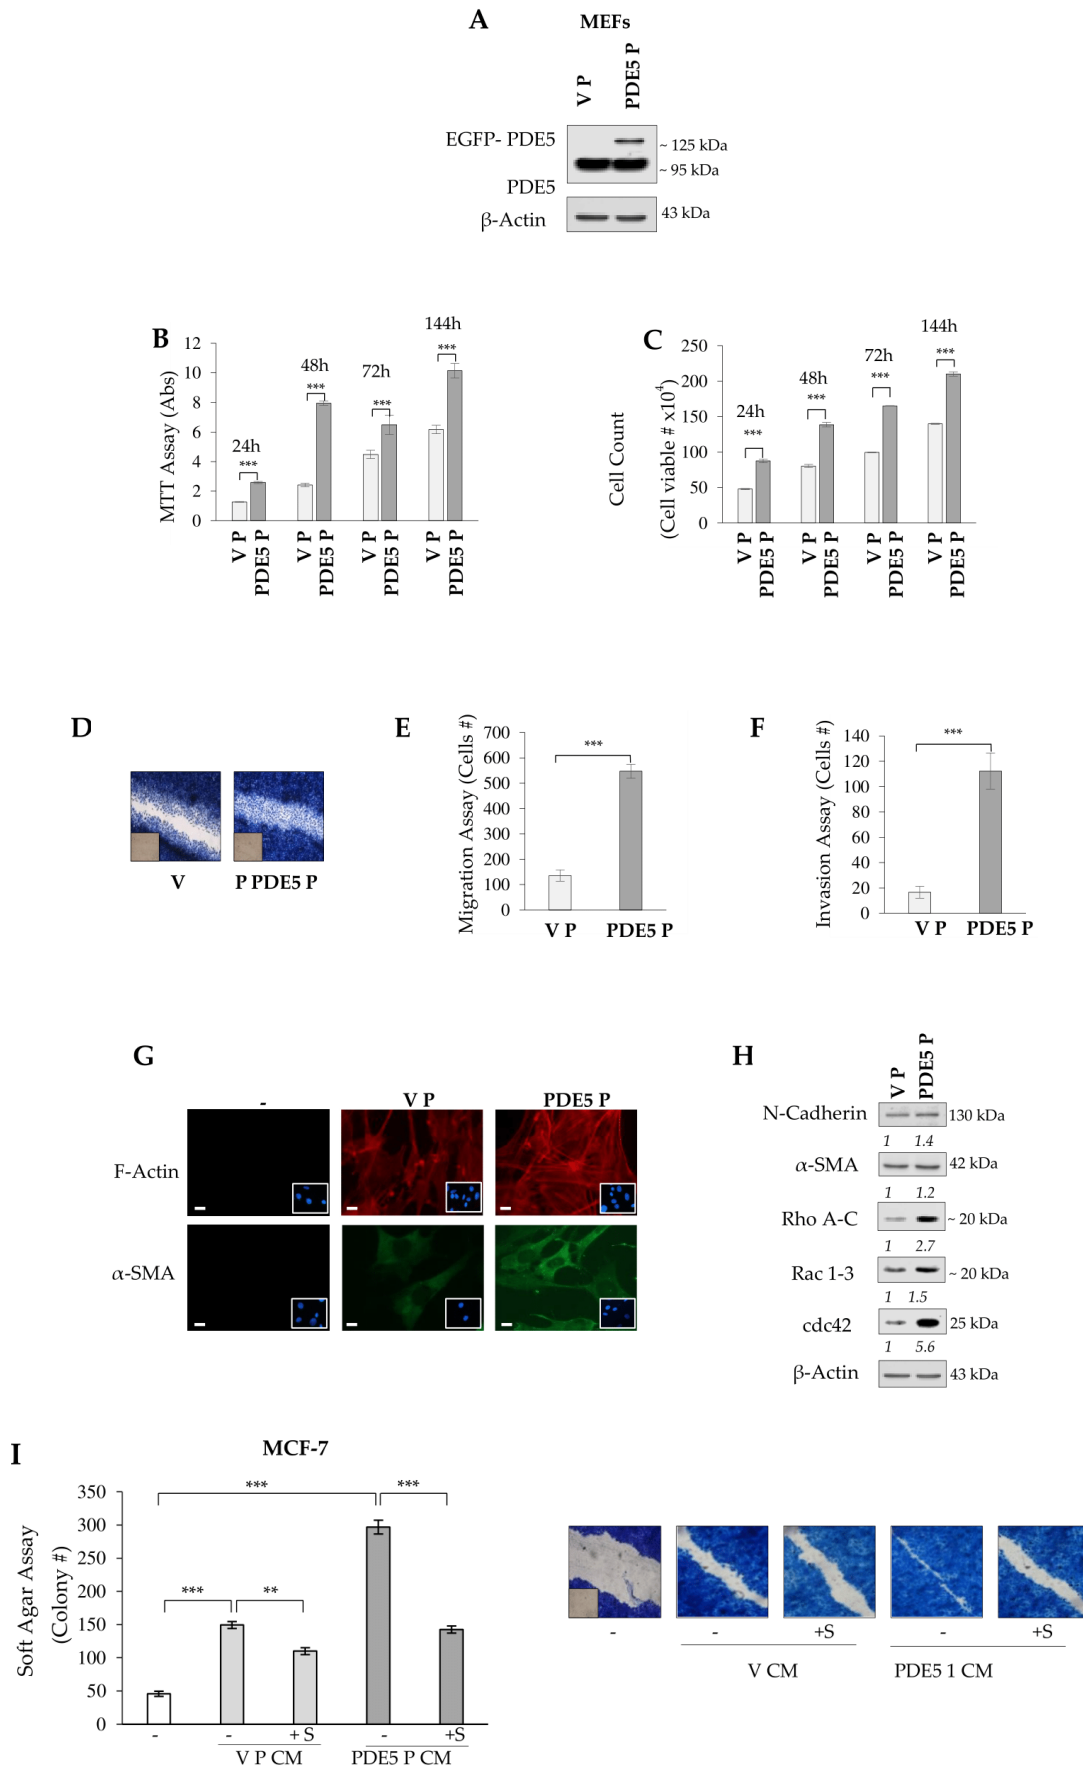

**Supplementary Figure S2.** (A) Immunoblotting for PDE5 expression in Mouse Embryonic Fibroblasts (MEFs) Vector (V P) and PDE5 (PDE5 P) stable pools.  $\beta$ -Actin was used as a control for equal loading and transfer. Italicized numbers below blots represent the mean of the band optical density expressed

as fold over V P for PDE P. MTT growth (B) and Trypan blue cell count (C) assays in V P and PDE5 P under basal nonstimulated conditions at indicated times. (D), Wound healing assay in V P and PDE5 P with images captured at 0 (inset) and 12 h. Pictures are representative of three independent experiments. Boyden-Chamber Transmigration (E) and Invasion (F) assays in V P and PDE5 P under basal nonstimulated conditions. (G), Immunofluorescent staining of Phalloidin staining of F-Actin (stress fibers, red, upper panel)  $\alpha$ -SMA (lower panel) in stable pools. DAPI staining was used for nuclei detection (inset). Pictures are representative of three independent experiments. Scale bar = 5  $\mu$ m. (H), Immunoblotting for N-Cadherin,  $\alpha$ -SMA, Rho A-C, Rac 1-3, cdc42 expression levels in V P and PDE5 P.  $\beta$ -Actin was used as a control for equal loading and transfer. Italicized numbers below blots represent the mean of the band optical density expressed as fold over V P for PDE P. (I), Soft agar growth (left panel) and wound healing (right panel) assays in MCF-7 breast cancer cells incubated with conditioned medium (CM) derived from V P and PDE5 P treated with vehicle (-) or Sildenafil (+S, 10  $\mu$ M). The values represent the mean  $\pm$  S.E.M. of three different experiments, each performed in triplicate. \*  $p < 0.05$ , \*\*  $p < 0.005$ , \*\*\*  $p < 0.0005$ .

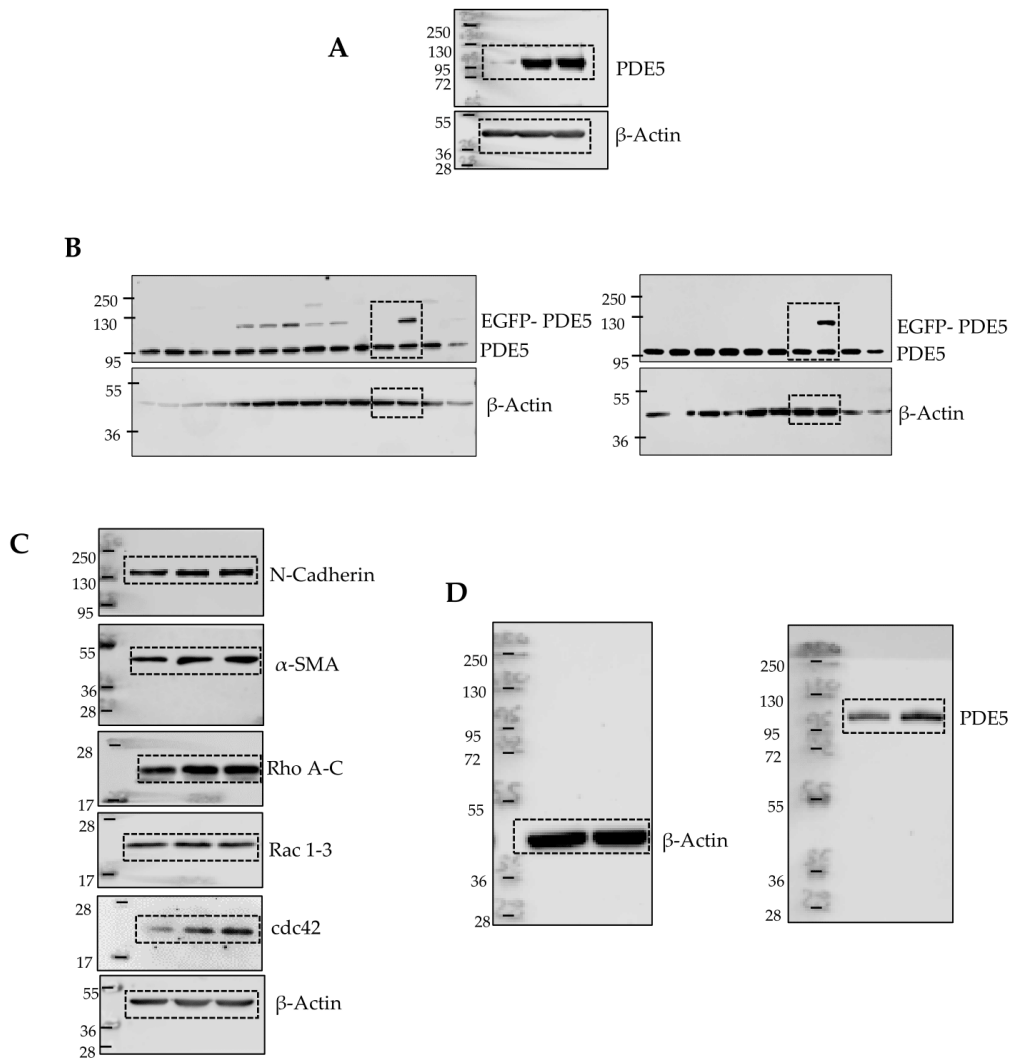

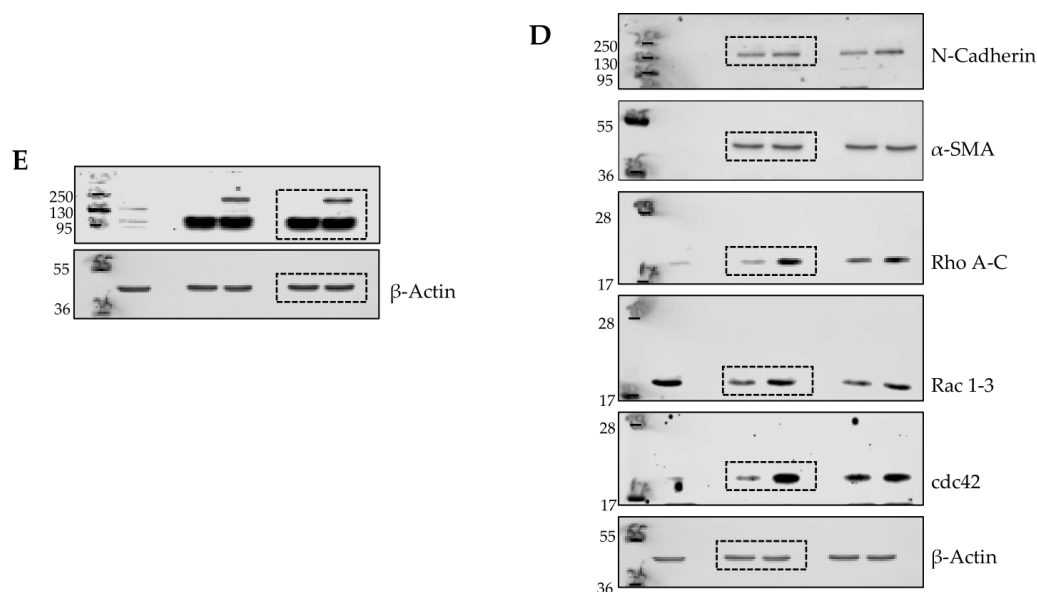

**Supplementary Figure S3.** Uncropped western blots from primary figures are shown. (A) Figure 2B; (B), Figure 4A; (C), Figure 4H; (D), Figure 4L; (E), Supplementary Figure 2A; (F), Supplementary Figure 2H.

**Supplementary Table S1.** Primers used in this study.

| Gene Name                                | Gene Symbol   | Species |         | Primer sequences               |
|------------------------------------------|---------------|---------|---------|--------------------------------|
| Alpha-Smooth Muscle Actin                | <i>α-SMA</i>  | Human   | Forward | 5'-GCAGCCCAGCCAAGCACTGT-3'     |
|                                          |               |         | Reverse | 5'-TGGGAGCATCGTCCCCAGCA-3'     |
| Fibroblast Activation Protein            | <i>FAP</i>    | Human   | Forward | 5'-AGAAAGCAGAACTGGATGG-3'      |
|                                          |               |         | Reverse | 5'-ACACACTTCTTGCTTGGAGGAT-3'   |
| Phosphodiesterase 5A                     | <i>PDE5A</i>  | Human   | Forward | 5'-ACTTGCAATTGCTGATTGCTG-3'    |
|                                          |               |         | Reverse | 5'-TTGAATAGGCCAGGGTTTTG-3'     |
| Phosphodiesterase 5A                     | <i>PDE5A</i>  | Mouse   | Forward | 5'-GCGAGTGCAAGTTGAGTCTT-3'     |
|                                          |               |         | Reverse | 5'-GCAGGAAGACGTTACAGAC-3'      |
| C-X-C motif chemokine Ligand 16          | <i>CXCL16</i> | Human   | Forward | 5'-TCCAGATCTGCCGTTTCATT-3'     |
|                                          |               |         | Reverse | 5'-GGGCAACATAGAGTCCGCTCT-3'    |
| C-X-C motif chemokine Ligand 16          | <i>CXCL16</i> | Mouse   | Forward | 5'-ACTCAGCACTCCACTCTTCC-3'     |
|                                          |               |         | Reverse | 5'-TCTCATTGCCTCAGCCTCA-3'      |
| Glyceraldehyde-3-Phosphate Dehydrogenase | <i>GAPDH</i>  | Human   | Forward | 5'-TGGTATCGTGGAAGGACTCATGAC-3' |
|                                          |               |         | Reverse | 5'-ATGCCAGTGAGCTTCCGTTTCAGC-3' |
| 36B4                                     | <i>36B4</i>   | Mouse   | Forward | 5'-AGATTCCGGATATGCTGTTGG-3'    |
|                                          |               |         | Reverse | 5'-AAAGCCTGGAAGAAGGAGGTG-3'    |
